# Supplementary material for: Diet and Gastrointestinal Bypass–Induced Weight Loss: The Roles of Ghrelin and Peptide YY
Source: PubMed Central journal article supplement — Diabetes. 2011 Feb 21;60(3):810–8. doi: 10.2337/db10-0566 (PMC3046841; doi:10.2337/db10-0566), 2011-02-21
Supplement: supp_db10-0566_DB100566SupplementaryData1.pdf [file supp_db10-0566_DB100566SupplementaryData1.pdf]

SUPPLEMENTARY DATA

**Supplementary Table 1. Diet Composition**

|                              | Diet               |               |
|------------------------------|--------------------|---------------|
|                              | Control<br>D12450B | HFD<br>D12451 |
| <b>Carbohydrate(%energy)</b> | 70                 | 35            |
| <b>Fat (%energy)</b>         | 10                 | 45            |
| <b>Protein (%energy)</b>     | 20                 | 20            |
| <b>Energy/g (kcal)</b>       | 3.85               | 4.73          |
| <b>Fat content (g)</b>       |                    |               |
| <b>Lard</b>                  | 20.0               | 177.5         |
| <b>Soya bean</b>             | 25.0               | 25.0          |

Macronutrient composition and fat content of control and high-fat diet (HFD) obtained from Research diets inc. (NJ, USA).

**Supplementary Table 2. Assay characteristics**

| Assay              | Sensitivity | Intra-assay variation (%) | Inter-assay variation (%) |
|--------------------|-------------|---------------------------|---------------------------|
| Leptin ELISA       | 0.05 ng/ml  | 4.5                       | 6.0                       |
| Acyl-ghrelin RIA   | 1.8 pmol/L  | 4.8                       | 6.2                       |
| Total PYY RIA      | 4.0 pmol/L  | 3.4                       | 5.8                       |
| Active GLP-1 ELISA | 2 pmol/L    | 6.3                       | 7.2                       |

Sensitivities and assay variations of commercial RIAs and ELISAs used.

**Supplementary Table 3. Effect of dietary modification on fasted colonic expression of *Pyy* and *glucagon***

| Diet group                | Colonic <i>Pyy</i> expression (AU) | Colonic <i>glucagon</i> expression (AU) |
|---------------------------|------------------------------------|-----------------------------------------|
| <b>Control</b>            | 1.00 ± 0.08                        | 0.76 ± 0.05                             |
| <b>DIO</b>                | 0.96 ± 0.05                        | 0.81 ± 0.09                             |
| <b>DIO-Switch</b>         | 1.11 ± 0.11                        | 0.91 ± 0.11                             |
| <b>Caloric-restricted</b> | 0.83 ± 0.07                        | 0.59 ± 0.06                             |

Data are means ± SE

**Supplementary Figure 1. Schematic of gastrointestinal bypass (GIBP) procedure**

Following laparotomy, the pyloric sphincter was ligatured. An anastomosis was created between a distal loop of jejunum and the stomach resulting in bypass of the duodenum and proximal jejunum. Arrows signify direction of nutrient flow.

**Supplementary Figure 2. Correlation analyses of bodyweight with plasma acyl-ghrelin and stomach *Mboat4* expression**

Correlation analysis between bodyweight and plasma acyl-ghrelin for mice exposed to both control-diet and HFD for (A) 4 weeks, (B) 8 weeks, (C) 12 weeks and (D) 16 weeks. Correlation analysis between bodyweight and stomach *Mboat4* expression for mice exposed to both control-diet and HFD for (E) 4 weeks and (F) 8 weeks.

## SUPPLEMENTARY DATA

### **Supplementary Figure 3. Correlation analyses of bodyweight with plasma PYY**

Correlation analysis between bodyweight and fasting plasma PYY for mice exposed to both control-diet and HFD for (A) 8 weeks (B) 12 weeks and (C) 16 weeks.

### **Supplementary Figure 4. Bodyweight curves and relationship between bodyweight and fasting plasma acyl-ghrelin levels in response to dietary modification**

Bodyweight curves and correlation analysis between bodyweight and fasting plasma acyl-ghrelin levels in control, DIO, DIO-switch and calorically restricted (CR) groups.

### **Supplementary Figure 5. Bodyweight curves and correlation analyses of bodyweight with fasting plasma total PYY and colonic *Pyy* expression in WT mice following GIBP surgery**

Bodyweight curves (A) and correlation analyses of bodyweight with (B) fasting plasma total PYY and (C) colonic *Pyy* expression in WT mice culled 10 days following GIBP surgery (WT.BP) or sham procedure (WT.S).
